# Supplementary material for: Physico-chemical role of CdSe/ZnS quantum dots in the photo-polymerization process of acrylate composite materials
Source: Royal Society of Chemistry journal article supplement (doi:10.1039/c2cp40746a), 2012-01-01
Supplement: c2cp40746a.pdf [file c2cp40746a.pdf]

## Supporting-information

### Physico-Chemical Role of CdSe/ZnS Quantum Dots in the Photo-Polymerization Process of Acrylate Composite Materials

Anne Barichard, Tigran Galstian and Yaël Israëlî

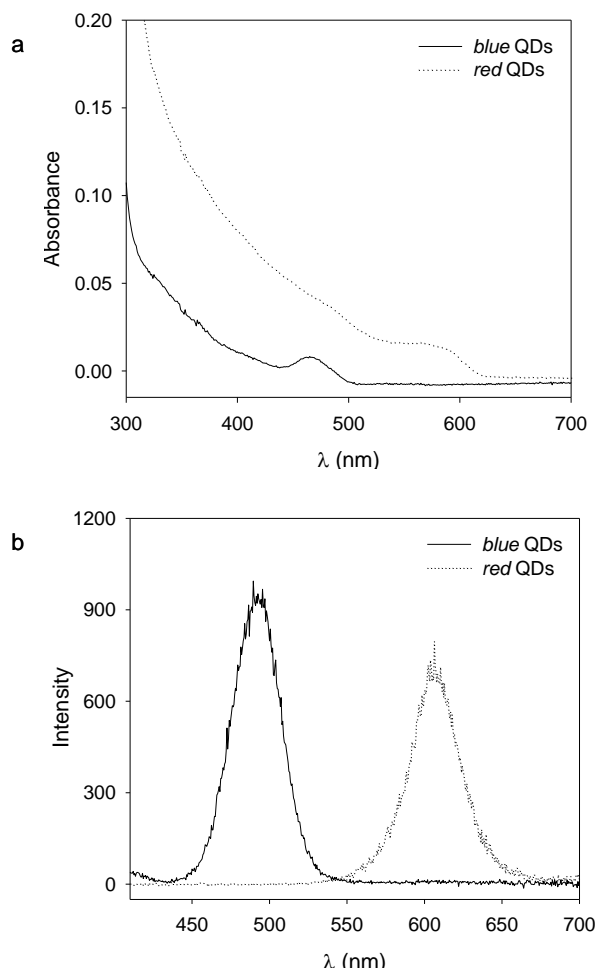

**Fig. S1.** (a) UV-visible spectra and (b) fluorescence spectra under excitation at 400 nm of blue and red CdSe/ZnS QDs in toluene.

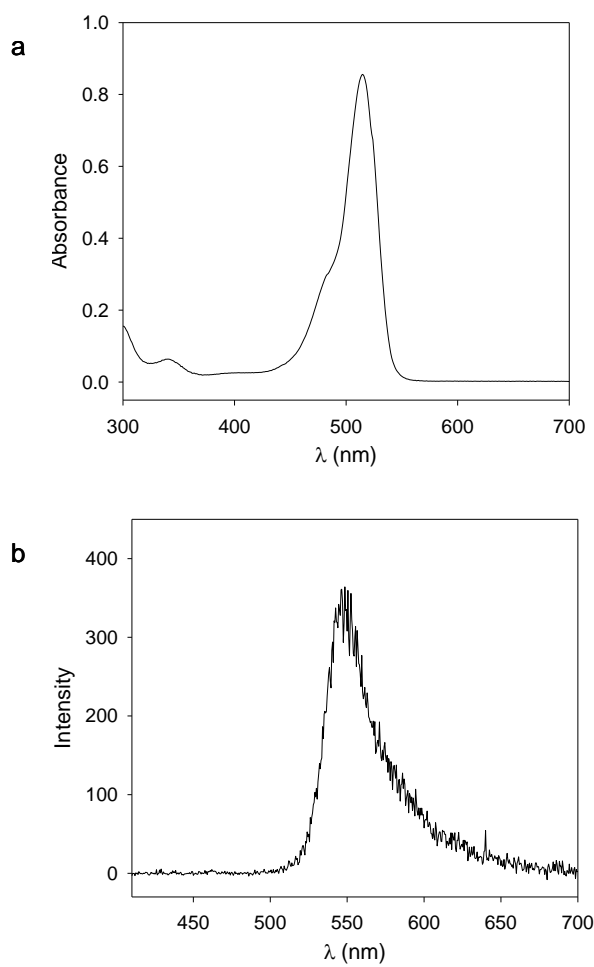

**Fig. S2.** (a) UV-visible spectra and (b) fluorescence spectra under excitation at 400 nm of eosin Y in water.

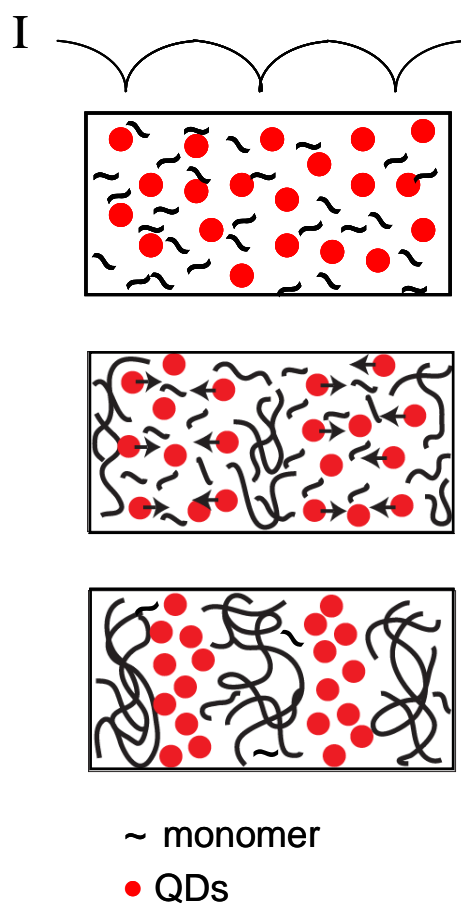

**Fig. S3.** Schematic representation of the formation of grating recorded in QD dispersed photopolymer.
